# Supplementary material for: Modeling hypothermia induced effects for the heterogeneous ventricular tissue from cellular level to the impact on the ECG
Source: PubMed Central journal article supplement (PMC5558962; doi:10.1371/journal.pone.0182979), 2017-08-16
Supplement: pone.0182979.s002.pdf [file pone.0182979.s002.pdf]

## S2 TEXT: Q10 VALUES

### **Modeling hypothermia induced effects for the heterogeneous ventricular tissue from cellular level to the impact on the ECG**

<sup>1</sup>Roland Kienast, <sup>1</sup>Michael Handler, <sup>1</sup>Markus Stöger, <sup>1,3</sup>Daniel Baumgarten, <sup>1</sup>Friedrich Hanser, <sup>1,2</sup>Christian Baumgartner

<sup>1</sup> Institute of Electrical and Biomedical Engineering, UMIT – University for Health Sciences, Medical Informatics and Technology, A-6060 Hall in Tyrol, Austria

<sup>2</sup> Institute of Health Care Engineering with European Testing Center of Medical Devices, Graz University of Technology, A-8010 Graz, Austria

<sup>3</sup>Institute of Biomedical Engineering and Informatics, Technische Universität Ilmenau, D-98693 Ilmenau, Germany

### **Content**

|                                           |   |
|-------------------------------------------|---|
| Q10 values extracted from literature..... | 2 |
| APD .....                                 | 2 |
| V <sub>max</sub> .....                    | 2 |
| CL .....                                  | 3 |
| CV .....                                  | 3 |
| References.....                           | 4 |

## Q10 values extracted from literature

This supplemental includes estimated  $Q_{10}$  values based on literature where the  $Q_{10}$  values (APD,  $V_{\max}$ , CL, CV) are calculated based on two values for different temperatures, respectively, using

$$Q_{10} = \left( \frac{X_{\text{high}}}{X_{\text{low}}} \right)^{\left( \frac{10}{T_{\text{high}} - T_{\text{low}}} \right)} \quad (5)$$

where  $X_{\text{high}}$  denotes the value of the investigated feature at higher temperature  $T_{\text{high}}$  and  $X_{\text{low}}$  the value at the lower temperature  $T_{\text{low}}$ . Thereby, the two values at high and low temperature are extracted from textual description or estimated based on available graphics in the respective literature. Table I summarizes the results for APD, Table II for  $V_{\max}$ , Table III for CL and Table IV for CV.

### APD

Table I: Estimated  $Q_{10}$  values for APD based on literature

| $Q_{10}$ | Measure | Species    | Tissue                       | Temperature range | Reference |
|----------|---------|------------|------------------------------|-------------------|-----------|
| 0.66     | APD90   | guinea-pig | ventricular papillary muscle | 37-27             | [1]       |
| 0.83     | APD95   | rabbit     | left ventricle               | 33-23             | [2]       |
| 0.53     | APD90   | rabbit     | isolated papillary muscles   | 37-27             | [3]       |
| 0.44     | APD90   | guinea-pig | ventricular papillary muscle | 37-27             | [4]       |
| 0.48     | APD90   | guinea-pig | ventricular and atrial cells | 35-25             | [5]       |
| 0.75     | APD90   | pig        | ventricular septum           | 37-32             | [6]       |
| 0.61     | APD70   | rabbit     | ventricle                    | 37-17             | [7]       |
| 0.58     | APD     | dog        | left ventricle               | 36-32             | [8]       |
| 0.55     | APD90   | rats       | papillary muscles            | 37-10             | [9]       |

### $V_{\max}$

Table II: Estimated  $Q_{10}$  values for  $V_{\max}$  based on literature

| $Q_{10}$ | Species    | Tissue                       | Temperature range | Reference |
|----------|------------|------------------------------|-------------------|-----------|
| 1.56     | guinea-pig | ventricular papillary muscle | 37-27             | [1]       |
| 1.51     | chicken    | right ventricle              | 37-20             | [10]      |
| 1.59     | rabbit     | left ventricle               | 33-23             | [2]       |
| 1.65     | rabbit     | isolated papillary muscles   | 37-27             | [3]       |
| 1.4      | guinea-pig | ventricular papillary muscle | 37-27             | [4]       |
| 2.35     | guinea-pig | ventricular cells            | 35-25             | [5]       |

The obtained  $Q_{10}$  value for  $V_{\max}$  of 1.68 used in the model was estimated by calculating the mean value of all listed  $Q_{10}$  values in table II.

## CL

In literature, the information about heart rate is usually indicated by beats per minute (ppm). To convert values from ppm to CL following formula was used

$$CL = \frac{60}{ppm}$$

where CL denotes the value for the cycle length in seconds and ppm the value for the heart rate in beats per minute.

Table III: Estimated  $Q_{10}$  values for CL based on literature

| $Q_{10ppm}$ | $Q_{10CL}$ | Species | Temperature range | Reference |
|-------------|------------|---------|-------------------|-----------|
| 3           | 0.35       | rat     | 34-23             | [11]      |
| 2           | 0.5        | pig     | 37-31             | [12]      |
| 3.6         | 0.28       | dog     | 40-20.5           | [13]      |

## CV

Table IV: Estimated  $Q_{10}$  values for CV based on literature

| $Q_{10}$ | Species | Tissue          | Temperature range | Reference |
|----------|---------|-----------------|-------------------|-----------|
| 1.5      | chicken | right ventricle | 37-20             | [10]      |
| 1.39     | rabbit  | ventricle       | 37-27             | [7]       |
| 1.47     | rabbit  | ventricle       | 37-27             | [14]      |
| 1.59     | dog     | left ventricle  | 36-26             | [15]      |

## References

1. Melnikov AL, Lathrop DA, Helgesen KG. Diazepam-induced Ca(2+)-channel blockade reduces hypothermia-induced electromechanical changes in isolated guinea pig ventricular muscle. *Eur J Anaesthesiol.* 1998;15(1):96–102. PubMed PMID: 9522148. eng.
2. Samson JP, Reisin I, Ruiz-Ceretti E, Schanne OF. Effects of low temperature on intracellular ionic concentrations and transmembrane potential in isolated rabbit hearts. *J Mol Cell Cardiol.* 1977;9(1):39–50. PubMed PMID: 845974. eng.
3. Fedorov VV, Li L, Glukhov A, Shishkina I, Aliev RR, Mikheeva T, et al. Hibernator *Citellus undulatus* maintains safe cardiac conduction and is protected against tachyarrhythmias during extreme hypothermia: possible role of Cx43 and Cx45 up-regulation. *Heart Rhythm.* 2005;2(9):966–75. doi: 10.1016/j.hrthm.2005.06.012. PubMed PMID: 16171752. eng.
4. Bjørnstad H, Tande PM, Lathrop DA, Refsum H. Effects of temperature on cycle length dependent changes and restitution of action potential duration in guinea pig ventricular muscle. *Cardiovasc Res.* 1993;27(6):946–50. PubMed PMID: 8221783. eng.
5. Hume JR, Uehara A. Ionic basis of the different action potential configurations of single guinea-pig atrial and ventricular myocytes. *J Physiol.* 1985;368:525–44. PubMed PMID: 2416918. eng.
6. Roscher R, Arlock P, Sjöberg T, Steen S. Effects of dopamine on porcine myocardial action potentials and contractions at 37 degrees C and 32 degrees C. *Acta Anaesthesiol Scand.* 2001;45(4):421–6. PubMed PMID: 11300379. eng.
7. Egorov YV, Glukhov AV, Efimov IR, Rosenshtraukh LV. Hypothermia-induced spatially discordant action potential duration alternans and arrhythmogenesis in nonhibernating versus hibernating mammals. *Am J Physiol Heart Circ Physiol.* 2012;303(8):H1035-46. doi: 10.1152/ajpheart.00786.2011. PubMed PMID: 22886418. eng.
8. Piktel JS, Rosenbaum DS, Wilson LD. Mild hypothermia decreases arrhythmia susceptibility in a canine model of global myocardial ischemia\*. *Crit Care Med.* 2012;40(11):2954–9. doi: 10.1097/CCM.0b013e31825fd39d. PubMed PMID: 22890250. eng.
9. Wang S-Q, Cao H-M, Zhou Z-Q. Temperature dependence of the myocardial excitability of ground squirrel and rat. *J Therm Biol.* 1997;22(3):195–9. doi: 10.1016/S0306-4565(97)00010-7.
10. Hirota A, Fujii S, Sakai T, Kamino K. Temperature dependence of spontaneous electrical activity in early embryonic heart monitored optically with a potential-sensitive dye. *Jpn J Physiol.* 1983;33(1):85–100. PubMed PMID: 6855032. eng.
11. Harary I, Farley B. In vitro studies on single beating rat heart cells. II. Intercellular communication. *Exp Cell Res.* 1963;29:466–74. PubMed PMID: 13952709. eng.
12. Weisser J, Martin J, Bisping E, Maier LS, Beyersdorf F, Hasenfuss G, et al. Influence of mild hypothermia on myocardial contractility and circulatory function. *Basic Res Cardiol.* 2001;96(2):198–205. PubMed PMID: 11327339. eng.
13. Berne RM. Myocardial Function in Severe Hypothermia. *Circ Res.* 1954;2(1):90–5. doi: 10.1161/01.RES.2.1.90.
14. Fedorov VV, Glukhov AV, Sudharshan S, Egorov Y, Rosenshtraukh LV, Efimov IR. Electrophysiological mechanisms of antiarrhythmic protection during hypothermia in winter hibernating versus nonhibernating mammals. *Heart Rhythm.* 2008;5(11):1587–96. doi: 10.1016/j.hrthm.2008.08.030. PubMed PMID: 18984537. eng.
15. Piktel JS, Jeyaraj D, Said TH, Rosenbaum DS, Wilson LD. Enhanced dispersion of repolarization explains increased arrhythmogenesis in severe versus therapeutic hypothermia. *Circ Arrhythm Electrophysiol.* 2011;4(1):79–86. doi: 10.1161/CIRCEP.110.958355. PubMed PMID: 21163888. eng.
