# Supplementary material for: Modeling hypothermia induced effects for the heterogeneous ventricular tissue from cellular level to the impact on the ECG
Source: PubMed Central journal article supplement (PMC5558962; doi:10.1371/journal.pone.0182979), 2017-08-16
Supplement: pone.0182979.s004.pdf [file pone.0182979.s004.pdf]

## S2 FIG.

### Modeling hypothermia induced effects for the heterogeneous ventricular tissue from cellular level to the impact on the ECG

<sup>1</sup>Roland Kienast, <sup>1</sup>Michael Handler, <sup>1</sup>Markus Stöger, <sup>1,3</sup>Daniel Baumgarten, <sup>1</sup>Friedrich Hanser, <sup>1,2</sup>Christian Baumgartner

<sup>1</sup> Institute of Electrical and Biomedical Engineering, UMIT – University for Health Sciences, Medical Informatics and Technology, A-6060 Hall in Tyrol, Austria

<sup>2</sup> Institute of Health Care Engineering with European Testing Center of Medical Devices, Graz University of Technology, A-8010 Graz, Austria

<sup>3</sup> Institute of Biomedical Engineering and Informatics, Technische Universität Ilmenau, D-98693 Ilmenau, Germany

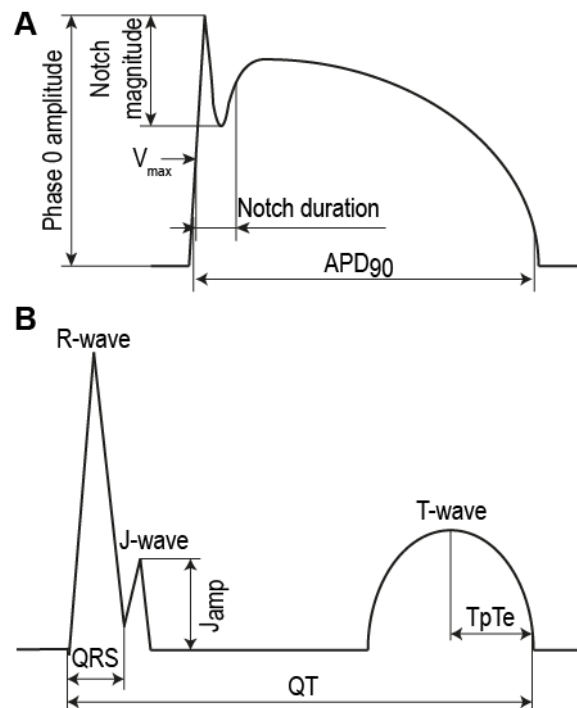

Fig S2: Schematic illustration of (A) a single AP complex and the determined parameters and (B) of a single pECG complex and the determined ECG parameters.
