# Supplementary material for: Modeling hypothermia induced effects for the heterogeneous ventricular tissue from cellular level to the impact on the ECG
Source: PubMed Central journal article supplement (PMC5558962; doi:10.1371/journal.pone.0182979), 2017-08-16
Supplement: pone.0182979.s006.pdf [file pone.0182979.s006.pdf]

# S1 Table

## Modeling hypothermia induced effects for the heterogeneous ventricular tissue from cellular level to the impact on the ECG

<sup>1</sup>Roland Kienast, <sup>1</sup>Michael Handler, <sup>1</sup>Markus Stöger, <sup>1,3</sup>Daniel Baumgarten, <sup>1</sup>Friedrich Hanser, <sup>1,2</sup>Christian Baumgartner

<sup>1</sup>Institute of Electrical and Biomedical Engineering, UMIT – University for Health Sciences Medical Informatics and Technology, A-6060 Hall in Tyrol, Austria

<sup>2</sup>Institute of Health Care Engineering with European Testing Center of Medical Devices, Graz University of Technology, A-8010 Graz, Austria

<sup>3</sup>Institute of Biomedical Engineering and Informatics, Technische Universität Ilmenau, D-98693 Ilmenau, Germany

Table S1: Detailed information about all absolute values estimated at different temperatures for n=18 cell layer.

| Cell Culture | Temp. [°C] | Fprise ms   |        |       | Fpdur ms    |        |       | Fpmin mV    |        |      | CV cm/s     |        |     |
|--------------|------------|-------------|--------|-------|-------------|--------|-------|-------------|--------|------|-------------|--------|-----|
|              |            | Group Count | Median | MAD   | Group Count | Median | MAD   | Group Count | Median | MAD  | Group Count | Median | MAD |
| 1            | 31         | 2381        | 0,163  | 0,094 | 1779        | 344    | 82    | 2381        | -1,17  | 0,33 | 1662        | 14,8   | 1,3 |
|              | 33         | 2486        | 0,146  | 0,110 | 1897        | 301    | 73    | 2487        | -1,35  | 0,37 | 1724        | 17,1   | 1,6 |
|              | 35         | 2092        | 0,132  | 0,057 | 1364        | 312    | 141   | 2092        | -1,33  | 0,35 | 1464        | 18,7   | 1,7 |
|              | 37         | 8012        | 0,126  | 0,039 | 4980        | 276    | 96    | 8012        | -1,20  | 0,33 | 5721        | 18,7   | 1,8 |
| 2            | 31         | 36736       | 0,126  | 0,023 | 36423       | 311    | 10    | 36736       | -1,55  | 0,45 | 16992       | 22,7   | 2,1 |
|              | 33         | 5752        | 0,117  | 0,025 | 5720        | 272    | 8     | 5752        | -1,65  | 0,44 | 2664        | 25,0   | 2,0 |
|              | 35         | 12650       | 0,109  | 0,023 | 12603       | 243    | 5     | 12650       | -1,69  | 0,45 | 5856        | 26,5   | 2,0 |
|              | 37         | 16551       | 0,102  | 0,020 | 16341       | 214    | 4     | 16551       | -1,74  | 0,48 | 7656        | 27,8   | 2,1 |
| 3            | 21         | 893         | 0,253  | 0,053 | 728         | 577    | 189   | 893         | -1,66  | 0,59 | 380         | 14,9   | 0,7 |
|              | 23         | 2115        | 0,223  | 0,047 | 1803        | 510    | 145   | 2115        | -2,20  | 0,57 | 900         | 15,4   | 1,3 |
|              | 25         | 3697        | 0,199  | 0,060 | 3229        | 455    | 113   | 3697        | -2,38  | 0,65 | 1524        | 17,1   | 1,5 |
|              | 27         | 2269        | 0,178  | 0,046 | 2068        | 414    | 52    | 2269        | -2,66  | 0,70 | 921         | 19,4   | 1,7 |
|              | 29         | 3400        | 0,162  | 0,035 | 3197        | 382    | 44    | 3400        | -2,75  | 0,77 | 1346        | 22,3   | 1,9 |
|              | 31         | 4671        | 0,146  | 0,033 | 4450        | 362    | 34    | 4671        | -2,65  | 0,78 | 1948        | 24,0   | 2,0 |
|              | 33         | 5271        | 0,142  | 0,030 | 5090        | 339    | 29    | 5271        | -2,92  | 0,76 | 2260        | 23,7   | 2,3 |
|              | 35         | 5928        | 0,136  | 0,029 | 5735        | 312    | 25    | 5928        | -2,95  | 0,76 | 2536        | 24,5   | 2,4 |
| 37           | 22502      | 0,130       | 0,030  | 21295 | 284         | 23     | 22502 | -2,90       | 0,75   | 9564 | 25,2        | 2,4    |     |

|       |    |       |       |       |       |     |     |       |       |      |       |      |     |
|-------|----|-------|-------|-------|-------|-----|-----|-------|-------|------|-------|------|-----|
| 4     | 21 | 878   | 0,339 | 0,047 | 422   | 942 | 319 | 878   | -0,37 | 0,17 | 1455  | 15,0 | 0,9 |
|       | 23 | 2380  | 0,261 | 0,040 | 1153  | 898 | 363 | 2380  | -0,39 | 0,18 | 1466  | 17,8 | 1,1 |
|       | 25 | 2437  | 0,214 | 0,032 | 1327  | 663 | 364 | 2437  | -0,48 | 0,19 | 1547  | 20,5 | 1,4 |
|       | 27 | 2503  | 0,183 | 0,032 | 1670  | 494 | 349 | 2503  | -0,52 | 0,20 | 3040  | 22,6 | 1,7 |
|       | 29 | 4975  | 0,164 | 0,039 | 3783  | 339 | 224 | 4975  | -0,56 | 0,19 | 4146  | 25,0 | 2,0 |
|       | 31 | 6834  | 0,146 | 0,030 | 5554  | 306 | 82  | 6834  | -0,57 | 0,19 | 6522  | 26,9 | 2,1 |
|       | 33 | 10720 | 0,135 | 0,025 | 9268  | 278 | 30  | 10720 | -0,56 | 0,19 | 7510  | 28,9 | 2,3 |
|       | 35 | 12340 | 0,125 | 0,023 | 11334 | 242 | 19  | 12340 | -0,57 | 0,20 | 10276 | 30,8 | 2,3 |
| <hr/> |    |       |       |       |       |     |     |       |       |      |       |      |     |
| 5     | 21 | 629   | 0,338 | 0,057 | 449   | 815 | 253 | 629   | -1,00 | 0,17 | 720   | 15,5 | 0,6 |
|       | 23 | 1272  | 0,240 | 0,041 | 1023  | 502 | 235 | 1272  | -1,33 | 0,24 | 1680  | 18,5 | 0,7 |
|       | 25 | 2968  | 0,193 | 0,032 | 2614  | 421 | 200 | 2968  | -1,52 | 0,28 | 3300  | 21,4 | 0,9 |
|       | 27 | 5830  | 0,164 | 0,027 | 5448  | 378 | 77  | 5830  | -1,66 | 0,31 | 3300  | 23,9 | 1,3 |
|       | 29 | 5830  | 0,144 | 0,024 | 5592  | 343 | 19  | 5830  | -1,76 | 0,36 | 3480  | 26,8 | 1,4 |
|       | 31 | 6148  | 0,126 | 0,018 | 6038  | 317 | 12  | 6148  | -1,79 | 0,38 | 2670  | 29,4 | 1,5 |
|       | 33 | 4717  | 0,115 | 0,016 | 4666  | 289 | 10  | 4717  | -1,82 | 0,39 | 3510  | 32,2 | 1,6 |
|       | 35 | 6201  | 0,107 | 0,015 | 6158  | 258 | 6   | 6201  | -1,82 | 0,41 | 5550  | 34,0 | 1,7 |
| <hr/> |    |       |       |       |       |     |     |       |       |      |       |      |     |
| 6     | 29 | 2128  | 0,160 | 0,024 | 1659  | 608 | 350 | 2128  | -1,48 | 0,33 | 1890  | 21,1 | 1,4 |
|       | 31 | 3024  | 0,144 | 0,022 | 2664  | 382 | 362 | 3024  | -1,60 | 0,34 | 4130  | 22,2 | 1,6 |
|       | 33 | 6611  | 0,137 | 0,020 | 6043  | 266 | 179 | 6611  | -1,72 | 0,37 | 6300  | 24,2 | 1,6 |
|       | 35 | 10080 | 0,124 | 0,017 | 9799  | 240 | 23  | 10080 | -1,81 | 0,40 | 19565 | 26,7 | 1,6 |
|       | 37 | 31304 | 0,112 | 0,014 | 30532 | 208 | 9   | 31304 | -1,85 | 0,42 | 1321  | 15,7 | 1,4 |
| <hr/> |    |       |       |       |       |     |     |       |       |      |       |      |     |
| 7     | 31 | 2538  | 0,212 | 0,106 | 1707  | 860 | 408 | 2538  | -0,21 | 0,06 | 1516  | 17,1 | 1,5 |
|       | 33 | 3926  | 0,192 | 0,091 | 2960  | 497 | 422 | 3926  | -0,23 | 0,08 | 1869  | 18,7 | 1,7 |
|       | 35 | 4520  | 0,176 | 0,091 | 3462  | 425 | 358 | 4520  | -0,23 | 0,08 | 3926  | 19,9 | 1,8 |
|       | 37 | 8402  | 0,164 | 0,082 | 6264  | 392 | 310 | 8402  | -0,22 | 0,08 | 750   | 15,2 | 1,0 |

|    |    |       |       |       |       |      |     |       |       |      |       |      |     |
|----|----|-------|-------|-------|-------|------|-----|-------|-------|------|-------|------|-----|
| 8  | 27 | 1375  | 0,210 | 0,029 | 1146  | 332  | 324 | 1375  | -1,49 | 0,37 | 2400  | 18,0 | 1,3 |
|    | 29 | 4400  | 0,173 | 0,024 | 4165  | 306  | 129 | 4400  | -1,65 | 0,44 | 3804  | 20,5 | 1,5 |
|    | 31 | 6983  | 0,154 | 0,024 | 6808  | 281  | 25  | 6983  | -1,86 | 0,47 | 4260  | 22,9 | 1,7 |
|    | 33 | 7810  | 0,142 | 0,022 | 7694  | 256  | 36  | 7810  | -2,11 | 0,49 | 4680  | 25,6 | 1,8 |
|    | 35 | 8580  | 0,127 | 0,019 | 8489  | 233  | 9   | 8580  | -2,08 | 0,50 | 5430  | 27,0 | 1,9 |
|    | 37 | 9955  | 0,121 | 0,018 | 9769  | 212  | 8   | 9955  | -2,13 | 0,49 | 1980  | 17,6 | 1,3 |
| 9  | 29 | 168   | 0,256 | 0,143 | 36    | 1048 | 459 | 168   | -0,18 | 0,06 | 280   | 17,6 | 2,0 |
|    | 31 | 448   | 0,227 | 0,119 | 167   | 978  | 414 | 448   | -0,18 | 0,07 | 557   | 19,2 | 2,2 |
|    | 33 | 901   | 0,207 | 0,121 | 401   | 990  | 432 | 901   | -0,19 | 0,07 | 3900  | 20,9 | 2,5 |
|    | 35 | 6198  | 0,194 | 0,173 | 4661  | 268  | 408 | 6198  | -0,20 | 0,08 | 6443  | 21,4 | 2,7 |
|    | 37 | 10558 | 0,188 | 0,114 | 8875  | 241  | 169 | 10558 | -0,24 | 0,08 | 490   | 18,9 | 2,3 |
| 10 | 25 | 2164  | 0,254 | 0,048 | 2040  | 479  | 63  | 2164  | -1,02 | 0,31 | 1053  | 18,5 | 1,4 |
|    | 27 | 1800  | 0,214 | 0,052 | 1628  | 435  | 273 | 1800  | -1,19 | 0,37 | 1290  | 21,7 | 1,7 |
|    | 29 | 2107  | 0,182 | 0,056 | 2062  | 384  | 203 | 2107  | -1,34 | 0,41 | 1735  | 24,2 | 2,0 |
|    | 31 | 2837  | 0,161 | 0,051 | 2830  | 345  | 25  | 2837  | -1,47 | 0,45 | 2370  | 26,1 | 2,3 |
|    | 33 | 3871  | 0,153 | 0,055 | 3764  | 311  | 34  | 3871  | -1,61 | 0,49 | 3450  | 28,0 | 2,3 |
|    | 35 | 5635  | 0,145 | 0,049 | 5129  | 275  | 25  | 5635  | -1,73 | 0,53 | 5130  | 29,8 | 2,4 |
|    | 37 | 8379  | 0,135 | 0,048 | 6689  | 234  | 17  | 8379  | -1,82 | 0,56 | 1031  | 18,9 | 1,4 |
| 11 | 29 | 5218  | 0,201 | 0,065 | 4456  | 294  | 319 | 5218  | -1,09 | 0,34 | 5495  | 20,3 | 1,6 |
|    | 31 | 8792  | 0,162 | 0,027 | 7798  | 256  | 139 | 8792  | -1,53 | 0,43 | 5810  | 22,4 | 1,7 |
|    | 33 | 9296  | 0,145 | 0,024 | 8490  | 234  | 76  | 9296  | -1,66 | 0,48 | 9764  | 25,1 | 1,7 |
|    | 35 | 15619 | 0,123 | 0,017 | 14411 | 203  | 19  | 15619 | -1,80 | 0,51 | 19209 | 26,2 | 1,9 |
|    | 37 | 30729 | 0,116 | 0,016 | 28618 | 174  | 13  | 30729 | -1,82 | 0,53 | 5495  | 21,6 | 1,6 |
| 12 | 33 | 6991  | 0,208 | 0,050 | 5784  | 191  | 76  | 6991  | -1,37 | 0,39 | 3576  | 25,3 | 2,7 |
|    | 35 | 6537  | 0,178 | 0,045 | 6053  | 167  | 44  | 6537  | -1,61 | 0,43 | 6731  | 27,4 | 2,9 |
|    | 37 | 12254 | 0,151 | 0,038 | 9812  | 154  | 97  | 12254 | -1,75 | 0,46 | 7824  | 27,0 | 2,7 |
| 13 | 31 | 7000  | 0,163 | 0,027 | 6054  | 301  | 235 | 7000  | -1,65 | 0,47 | 5314  | 23,1 | 1,7 |
|    | 33 | 8509  | 0,137 | 0,022 | 7432  | 265  | 109 | 8509  | -1,81 | 0,53 | 6300  | 25,0 | 1,8 |
|    | 35 | 10080 | 0,125 | 0,019 | 8939  | 234  | 46  | 10080 | -2,01 | 0,55 | 7595  | 26,8 | 1,9 |
|    | 37 | 12151 | 0,115 | 0,017 | 11063 | 205  | 24  | 12151 | -2,12 | 0,58 | 4830  | 22,5 | 1,7 |
| 14 | 31 | 2681  | 0,249 | 0,074 | 2641  | 203  | 44  | 2681  | -1,27 | 0,44 | 3094  | 22,4 | 2,6 |
|    | 33 | 5824  | 0,212 | 0,043 | 5750  | 186  | 35  | 5824  | -1,61 | 0,45 | 1860  | 25,6 | 3,3 |
|    | 35 | 3712  | 0,176 | 0,050 | 3047  | 174  | 24  | 3712  | -1,85 | 0,47 | 6669  | 27,8 | 3,2 |
|    | 37 | 12957 | 0,165 | 0,041 | 11795 | 154  | 21  | 12957 | -2,07 | 0,54 | 3729  | 27,9 | 4,0 |

|    |    |       |       |       |       |     |     |       |       |      |       |      |      |
|----|----|-------|-------|-------|-------|-----|-----|-------|-------|------|-------|------|------|
| 15 | 29 | 6210  | 0,225 | 0,040 | 5475  | 404 | 20  | 6210  | -0,53 | 0,12 | 4536  | 20,9 | 2,3  |
|    | 31 | 5832  | 0,203 | 0,037 | 5425  | 371 | 11  | 5832  | -0,53 | 0,14 | 7095  | 22,2 | 1,7  |
|    | 33 | 8910  | 0,191 | 0,053 | 8660  | 335 | 8   | 8910  | -0,59 | 0,14 | 7783  | 24,2 | 1,9  |
|    | 35 | 9774  | 0,175 | 0,050 | 9564  | 296 | 5   | 9774  | -0,61 | 0,14 | 48546 | 25,6 | 2,1  |
|    | 37 | 61830 | 0,164 | 0,046 | 59593 | 259 | 4   | 61830 | -0,64 | 0,15 | 3318  | 18,5 | 1,9  |
| 16 | 29 | 3190  | 0,197 | 0,029 | 2019  | 434 | 20  | 3190  | -2,04 | 0,51 | 2343  | 23,9 | 1,9  |
|    | 31 | 3905  | 0,178 | 0,026 | 2887  | 404 | 21  | 3905  | -2,18 | 0,55 | 3762  | 25,7 | 2,1  |
|    | 33 | 6270  | 0,161 | 0,023 | 5186  | 369 | 9   | 6270  | -2,37 | 0,58 | 4257  | 27,5 | 2,3  |
|    | 35 | 7095  | 0,149 | 0,021 | 6282  | 333 | 8   | 7095  | -2,54 | 0,60 | 27670 | 29,0 | 2,5  |
|    | 37 | 46644 | 0,140 | 0,022 | 43964 | 290 | 8   | 46645 | -2,71 | 0,62 | 165   | 13,2 | 1,5  |
| 17 | 29 | 4551  | 0,303 | 0,077 | 4094  | 353 | 20  | 4551  | -0,55 | 0,29 | 4800  | 27,6 | 3,8  |
|    | 31 | 6840  | 0,206 | 0,046 | 6592  | 332 | 19  | 6840  | -0,78 | 0,41 | 5465  | 29,9 | 3,3  |
|    | 33 | 8051  | 0,163 | 0,039 | 7858  | 314 | 12  | 8051  | -1,08 | 0,44 | 6431  | 35,0 | 4,1  |
|    | 35 | 9295  | 0,144 | 0,041 | 9113  | 285 | 14  | 9295  | -1,17 | 0,51 | 28488 | 38,2 | 4,8  |
|    | 37 | 40632 | 0,146 | 0,033 | 39456 | 253 | 8   | 40633 | -1,37 | 0,59 | 2431  | 20,5 | 3,3  |
| 18 | 25 | 2777  | 1,246 | 3,004 | 165   | 743 | 372 | 2777  | -0,14 | 0,14 | 2653  | 15,0 | 2,6  |
|    | 27 | 3359  | 0,492 | 2,033 | 678   | 374 | 430 | 3359  | -0,40 | 0,31 | 4565  | 20,2 | 40,6 |
|    | 29 | 6563  | 0,256 | 0,158 | 5095  | 293 | 123 | 6566  | -1,30 | 0,46 | 5019  | 22,8 | 2,1  |
|    | 31 | 6956  | 0,220 | 0,074 | 5824  | 292 | 100 | 6956  | -1,45 | 0,47 | 7945  | 24,8 | 2,2  |
|    | 33 | 10511 | 0,198 | 0,043 | 9279  | 272 | 41  | 10511 | -1,59 | 0,50 | 8273  | 26,3 | 2,5  |
|    | 35 | 10748 | 0,184 | 0,039 | 9835  | 251 | 31  | 10748 | -1,68 | 0,54 | 29653 | 28,9 | 3,4  |
|    | 37 | 41108 | 0,172 | 0,051 | 35987 | 223 | 26  | 41114 | -1,83 | 0,60 | 631   | 6,4  | 1,9  |
